# Supplementary material for: Screening microalgae isolated from urban storm- and wastewater systems as feedstock for biofuel
Source: PeerJ. 2016 Sep 1;4:e2396. doi: 10.7717/peerj.2396 (PMC5012288; doi:10.7717/peerj.2396)
Supplement: Supplemental Information 1 [file peerj-04-2396-s001.xlsx]

## Sheet: Sheet1
	Optical Density @ 550nm /Day								Cell/ml (based on standard curve created for each strain)
ID	0	1	2	3	4	5	6	7	0	1	2	3	4	5	6	7
Sp24.01	0.046	0.049	0.062	0.071	0.123	0.126	0.162	0.195	770000	820217	1.03783e+06	1.18848e+06	2.05891e+06	2.10913e+06	2.71174e+06	3.26413e+06
Sp21.02	0.069	0.154	0.162	0.202	0.258	0.35	0.432	0.48	1500000	3.34783e+06	3.52174e+06	4.3913e+06	5.6087e+06	7.6087e+06	9.3913e+06	1.04348e+07
WW3	0.013	0.013	0.027	0.046	0.061	0.067	0.077	0.088	200000	200000	415385	707692	938462	1.03077e+06	1.18462e+06	1.35385e+06
WW4	0.025	0.044	0.054	0.086	0.12	0.125	0.168	0.194	700000	1232000	1512000	2.408e+06	3360000	3500000	4704000	5432000
WW5	0.01	0.021	0.026	0.046	0.083	0.093	0.111	0.129	350000	735000	910000	1610000	2905000	3255000	3885000	4515000
Sp24.05	0.029	0.04	0.066	0.091	0.117	0.111	0.155	0.164	430000	593103	978621	1.34931e+06	1.73483e+06	1.64586e+06	2.29828e+06	2.43172e+06
Sp25.7	0.009	0.02	0.04	0.071	0.108	0.126	0.153	0.184	750000	1.66667e+06	3.33333e+06	5.91667e+06	9000000	10500000	1.275e+07	1.53333e+07
Sp12.07	0.03	0.052	0.053	0.081	0.107	0.171	0.211	0.208	220000	381333	388667	594000	784667	1254000	1.54733e+06	1.52533e+06
WW8	0.011	0.011	0.013	0.029	none	none	0.167	none	80000	80000	94545.5	210909	none	none	1.21455e+06	none
SpU.9	0.009	0.009	0.011	0.022	0.036	0.041	0.045	0.052	110000	110000	134444	268889	440000	501111	550000	635556
Sp11.11	0.01	0.01	0.022	0.048	0.069	0.087	0.102	0.123	90000	90000	198000	432000	621000	783000	918000	1107000
Sp19.011	0.009	0.031	0.051	0.091	0.125	0.168	0.206	0.277	1800000	6.2e+06	10200000	18200000	2.5e+07	33600000	41200000	5.54e+07
Sp21.12	0.064	0.088	0.135	0.195	0.217	0.253	0.367	0.441	170000	233750	358594	517969	576406	672031	974844	1.17141e+06
Sp15.012	0.021	0.02	0.02	0.041	0.073	0.083	0.108	0.132	160000	152381	152381	312381	556190	632381	822857	1.00571e+06
Sp23.13	0.032	0.045	0.083	0.12	0.234	0.237	0.322	0.416	2200000	3093750	5706250	8250000	1.60875e+07	16293750	22137500	28600000
Sp17.013	0.029	0.026	0.072	0.163	0.177	0.185	0.232	0.279	160000	143448	397241	899310	976552	1.02069e+06	1280000	1.53931e+06
Sp21.14	0.024	0.051	0.065	0.09	0.117	0.145	0.212	0.247	260000	552500	704167	975000	1267500	1.57083e+06	2.29667e+06	2.67583e+06
Sp19.014	0.008	0.008	0.027	0.048	0.084	0.105	0.121	0.159	220000	220000	742500	1320000	2310000	2887500	3327500	4372500
Sp19.15	0.046	0.054	0.111	0.151	0.196	0.245	0.343	0.388	620000	727826	1.49609e+06	2.03522e+06	2.64174e+06	3.30217e+06	4.62304e+06	5.22957e+06
Sp19.015	0.01	0.022	0.033	0.061	0.083	0.109	0.135	0.164	200000	440000	660000	1220000	1660000	2180000	2700000	3280000
Sp16.16	0.023	0.029	0.06	0.083	0.127	0.175	0.261	0.264	340000	428696	886957	1.22696e+06	1.87739e+06	2.58696e+06	3.85826e+06	3.90261e+06
Sp16.016	0.053	0.027	0.069	0.112	0.152	0.182	0.217	0.264	1700000	866038	2.21321e+06	3.59245e+06	4.87547e+06	5.83774e+06	6.96038e+06	8.46792e+06
WW18	0.032	0.04	0.081	0.109	0.145	0.198	0.283	0.329	400000	500000	1012500	1362500	1.8125e+06	2475000	3.5375e+06	4112500
Sp1.018	0.022	0.034	0.067	0.1	0.13	0.164	0.203	0.248	600000	927273	1.82727e+06	2.72727e+06	3.54545e+06	4.47273e+06	5.53636e+06	6.76364e+06
WW19	0.062	0.025	0.068	0.11	0.144	0.161	0.202	0.24	880000	354839	965161	1.56129e+06	2.04387e+06	2.28516e+06	2.8671e+06	3.40645e+06
Sp21.20	0.042	0.063	0.097	0.115	0.147	0.186	0.243	0.297	890000	1335000	2.05548e+06	2.4369e+06	3.115e+06	3.94143e+06	5.14929e+06	6.29357e+06
Sp21.23	0.031	0.022	0.064	0.107	0.15	0.199	0.254	0.296	710000	503871	1.46581e+06	2.45065e+06	3.43548e+06	4.55774e+06	5.81742e+06	6.77935e+06
Sp25.24	0.018	0.041	0.063	0.097	0.114	0.141	0.167	0.205	930000	2.11833e+06	3.255e+06	5.01167e+06	5890000	7.285e+06	8.62833e+06	1.05917e+07
Sp17.25	0.039	0.038	0.101	0.143	0.191	0.234	0.29	0.356	1700000	1.65641e+06	4.40256e+06	6.23333e+06	8.32564e+06	10200000	1.2641e+07	1.55179e+07
Sp16.26	0.048	0.038	0.093	0.133	0.168	0.204	0.254	0.303	830000	657083	1608125	2.29979e+06	2905000	3527500	4.39208e+06	5239375
WW27	0.027	0.057	none	0.264	0.381	0.49	0.587	0.661	440000	928889	none	4.30222e+06	6.20889e+06	7.98519e+06	9.56593e+06	1.07719e+07
Sp16.29	0.037	0.075	none	0.217	0.305	0.416	0.511	0.56	480000	972973	none	2.81514e+06	3.95676e+06	5.39676e+06	6.62919e+06	7.26486e+06
Sp16.028	0.033	0.063	none	0.206	0.311	0.353	0.414	0.453	420000	801818	none	2.62182e+06	3.95818e+06	4.49273e+06	5.26909e+06	5.76545e+06
Sp11.30	0.012	0.021	0.027	0.047	0.075	0.077	0.099	0.126	280000	490000	630000	1.09667e+06	1750000	1.79667e+06	2310000	2940000
Sp1.33	0.028	0.018	0.03	0.054	0.096	0.106	0.136	0.177	330000	212143	353571	636429	1.13143e+06	1.24929e+06	1.60286e+06	2.08607e+06
Sp16.34	0.021	0.018	0.054	0.09	0.121	0.153	0.197	0.244	350000	300000	900000	1500000	2.01667e+06	2550000	3.28333e+06	4.06667e+06
Sp12.36	0.035	0.029	0.071	0.114	0.154	0.196	0.247	0.293	450000	372857	912857	1.46571e+06	1.98e+06	2.52e+06	3.17571e+06	3.76714e+06
Sp21.37	0.004	0.012	0.022	0.056	0.084	0.097	none	0.107	80000	240000	440000	1120000	1680000	1940000	none	2140000
Sp17.38	0.018	0.017	0.052	0.081	0.119	0.148	0.179	0.212	240000	226667	693333	1080000	1.58667e+06	1.97333e+06	2.38667e+06	2.82667e+06
Sp1.40	0.014	0.012	0.029	0.05	0.078	0.089	0.106	0.128	150000	128571	310714	535714	835714	953571	1.13571e+06	1.37143e+06
Sp1.41	0.02	0.015	0.047	0.08	0.117	0.14	0.168	0.2	320000	240000	752000	1280000	1872000	2.24e+06	2688000	3200000
Sp1.44	0.038	0.034	0.072	0.099	0.115	0.152	0.187	0.211	900000	805263	1.70526e+06	2.34474e+06	2.72368e+06	3600000	4.42895e+06	4.99737e+06
Sp1.46	0.019	0.026	0.052	0.077	0.106	0.127	0.151	0.17	200000	273684	547368	810526	1.11579e+06	1.33684e+06	1.58947e+06	1.78947e+06
Sp1.50	0.024	0.051	0.065	0.09	0.117	0.145	0.212	0.247	290000	616250	785417	1087500	1413750	1.75208e+06	2.56167e+06	2.98458e+06
LO49	0.055	0.062	0.122	0.168	0.104	0.142	0.204	0.217	170000	191636	377091	519273	321455	438909	630545	670727
LO47	0.009	0.019	0.042	0.083	0.135	0.158	0.2	0.253	500000	1.05556e+06	2.33333e+06	4.61111e+06	7.5e+06	8.77778e+06	1.11111e+07	1.40556e+07
LO48	0.04	0.021	0.057	0.099	0.124	0.165	0.201	0.238	540000	283500	769500	1336500	1674000	2227500	2713500	3213000
LO.51	0.064	0.123	0.205667	0.277333	0.406	0.513333	0.530333	none	900000	1.72969e+06	2.89219e+06	3.9e+06	5709375	7218750	7.45781e+06	#VALUE!
Sp1.52	0.039	3.25e-08	3.25e-08	3.25e-08	3.25e-08	3.25e-08	3.25e-08	3.25e-08	1200000	1	1	1	1	1	1	1
Sp17.022	0.009	0.024	none	0.043	0.082	0.158	0.206	0.237	90000	240000	none	430000	820000	1.58e+06	2.06e+06	2370000
Sp14.35	0.008	0.015	0.039	0.066	0.13	0.196	0.365	0.467	160000	300000	780000	1400000	2600000	4000000	7300000	9400000
WW39	0.017	0.027	0.052	0.087	0.148	0.235	0.342	0.407	520000	825882	1.59059e+06	2.66118e+06	4.52706e+06	7.18824e+06	1.04612e+07	1.24494e+07
Sp1.43	0.023	0.033	0.069	0.095	0.121	0.219	0.366	0.412	570000	817826	1710000	2.35435e+06	2.9987e+06	5.42739e+06	9.07043e+06	1.02104e+07
Sp19.010	0.014	0.019	0.036	0.048	0.069	0.087	0.102	0.123	90000	122143	231429	308571	443571	559286	655714	790714
WW16	0.01	0.022	0.033	0.061	0.083	0.109	0.135	0.164	200000	440000	968000	2129600	4685120	10307264	2.2676e+07	4.98872e+07
Sp16.028	0.021	0.026	0.034	0.041	0.073	0.083	0.108	0.132	160000	198095	259048	312381	556190	632381	822857	1.00571e+06
Sp1.54	0.0296667	0.031	0.0703333	0.153	#DIV/0!	0.346333	0.463	0.542333	482222	523037	1.28245e+06	2.97466e+06	#DIV/0!	7.12966e+06	9.32269e+06	1.0886e+07
