# Supplementary material for: Screening microalgae isolated from urban storm- and wastewater systems as feedstock for biofuel
Source: PeerJ. 2016 Sep 1;4:e2396. doi: 10.7717/peerj.2396 (PMC5012288; doi:10.7717/peerj.2396)
Supplement: Supplemental Information 2 [file peerj-04-2396-s002.xlsx]

## Sheet: Sheet1
ID	Lauric acid ME(C12:0)	4,7,10,13 Hexadecatetraenoate ME (C16:4(n-3))	Palmitic acid ME(C16:0)	Oleic acid ME(C18:1)	Oleic acid ME trans (C18:1)	Linoleic acid ME (18:2)	8,11,14,17 Eicsoatetraenoic acid ME (C20:4(n-3))	ID	Lauric acid ME(C12:0)	4,7,10,13 Hexadecatetraenoate ME (C16:4(n-3))	Palmitic acid ME(C16:0)	Oleic acid ME(C18:1)	Oleic acid ME trans (C18:1)	Linoleic acid ME (18:2)	8,11,14,17 Eicsoatetraenoic acid ME(C20:4(n-3))	Total (%)
Sp1.41	0	0	0.444052	0.534959	0	0.0209895	0	Sp1.41	0	0	44.4052	53.4959	0	2.09895	0	100
Sp1.43	0	0	0.512269	0.475406	0	0.0123244	0	Sp1.43	0	0	51.2269	47.5406	0	1.23244	0	100
Sp1.44	0	0	0.490339	0.353488	0	0.0627387	0.0934342	Sp1.44	0	0	49.0339	35.3488	0	6.27387	9.34342	100
Sp1.46	0.0429879	0	0.400729	0.487584	0	0.0686985	0	Sp1.46	4.29879	0	40.0729	48.7584	0	6.86985	0	100
Sp1.50	0	0.434149	0.237199	0.328652	0	0	0	Sp1.50	0	43.4149	23.7199	32.8652	0	0	0	100
Sp1.52	0	0.0552965	0.451166	0.493537	0	0	0	Sp1.52	0	5.52965	45.1166	49.3537	0	0	0	100
Sp12.07	0	0.162451	0.410653	0.41211	0	0	0.0147862	Sp12.07	0	16.2451	41.0653	41.211	0	0	1.47862	100
Sp12.21	0.0011363	0.0194934	0.409889	0.563432	0	0.00604895	0	Sp12.21	0.11363	1.94934	40.9889	56.3432	0	0.604895	0	100
Sp12.36	0	0.0304641	0.344593	0.624943	0	0	0	Sp12.36	0	3.04641	34.4593	62.4943	0	0	0	100
Sp14.35	0	0	0.468558	0.525717	0	0.00572525	0	Sp14.35	0	0	46.8558	52.5717	0	0.572525	0	100
Sp16.26	0	0	0.4023	0.5977	0	0	0	Sp16.26	0	0	40.23	59.77	0	0	0	100
Sp16.34	0	0.0399822	0.0546801	0.842694	0	0.022	0.0406436	Sp16.34	0	3.99822	5.46801	84.2694	0	2.2	4.06436	100
SpU9	0.0193899	0.101439	0.745822	0.133349	0	0	0	SpU9	1.93899	10.1439	74.5822	13.3349	0	0	0	100
Sp17.013	0	0.272361	0.415704	0.311935	0	0	0	Sp17.013	0	27.2361	41.5704	31.1935	0	0	0	100
Sp17.022	0	0.10438	0.643663	0.134126	0.117831	0	0	Sp17.022	0	10.438	64.3663	13.4126	11.7831	0	0	100
Sp17.25	0	0	0.602313	0.3197	0	0.0779871	0	Sp17.25	0	0	60.2313	31.97	0	7.79871	0	100
Sp19.010	0.0142675	0.0592214	0.440164	0.486347	0	0	0	Sp19.010	1.42675	5.92214	44.0164	48.6347	0	0	0	100
Sp19.011	0.0350796	0.0705945	0.458755	0.435571	0	0	0	Sp11.011	3.50796	7.05945	45.8755	43.5571	0	0	0	100
Sp19.15	0	0.0412236	0.443316	0.515461	0	0	0	Sp19.15	0	4.12236	44.3316	51.5461	0	0	0	100
Sp19.40	0	0	0.880574	0.119426	0	0	0	Sp19.40	0	0	88.0574	11.9426	0	0	0	100
Sp21.02	0	0.171205	0.351223	0.116672	0	0.0957586	0.265141	Sp21.02	0	17.1205	35.1223	11.6672	0	9.57586	26.5141	100
Sp21.12	0	0.0248618	0.470728	0.492342	0	0.0120681	0	Sp21.12	0	2.48618	47.0728	49.2342	0	1.20681	0	100
Sp21.14	0	0.0171117	0.515498	0.348933	0	0.0616585	0.0567984	Sp21.14	0	1.71117	51.5498	34.8933	0	6.16585	5.67984	100
Sp21.20	0	0.0442862	0.575656	0.24913	0	0.0804533	0.0504753	Sp21.20	0	4.42862	57.5656	24.913	0	8.04533	5.04753	100
Sp21.37	0	0	0.482644	0.517356	0	0	0	Sp21.37	0	0	48.2644	51.7356	0	0	0	100
Sp23.13	0	0	0.893581	0.106419	0	0	0	Sp23.13	0	0	89.3581	10.6419	0	0	0	100
Sp24.05	0.0343401	0.142744	0.418089	0.404827	0	0	0	Sp24.05	3.43401	14.2744	41.8089	40.4827	0	0	0	100
LO47	0	0.0890755	0.724081	0.132005	0	0.0362622	0.0185765	LO47	0	8.90755	72.4081	13.2005	0	3.62622	1.85765	100
LO48	0	0.0427152	0.344485	0.597968	0	0.0148318	0	LO48	0	4.27152	34.4485	59.7968	0	1.48318	0	100
LO49	0	0	0.515328	0.307212	0	0.0537013	0.123759	LO49	0	0	51.5328	30.7212	0	5.37013	12.3759	100
LO51	0	0.163549	0.687555	0.137287	0	0.011609	0	LO51	0	16.3549	68.7555	13.7287	0	1.1609	0	100
WW3	0.0349864	0.0336179	0.267481	0.663915	0	0	0	WW3	3.49864	3.36179	26.7481	66.3915	0	0	0	100
WW5	0.00936756	0.250424	0.200969	0.41753	0	0.12171	0	WW5	0.936756	25.0424	20.0969	41.753	0	12.171	0	100
WW39	0	0.050547	0.144758	0.804695	0	0	0	WW39	0	5.0547	14.4758	80.4695	0	0	0	100
